# Supplementary material for: Highly efficient polymer solar cells based on a universal cathode interlayer composed of metallophthalocyanine derivative with good film-forming property
Source: Royal Society of Chemistry journal article supplement (doi:10.1039/c4ta06601d), 2015-01-01
Supplement: c4ta06601d1.pdf [file c4ta06601d1.pdf]

## Electronic Supplementary Information

### Highly Efficient Polymer Solar Cells Based on a Universal Cathode Interlayer Composed of Metallophthalocyanine Derivative with Good Film-Forming Property

By Tao Jia, Weilong Zhou, Youchun Chen, Jianxiong Han, Lu Wang, Fenghong Li\* and Yue Wang\*

State Key Laboratory of Supramolecular Structure and Materials, College of Chemistry, Jilin University, Changchun, 130012, P. R. China  
E-mail: fhli@jlu.edu.cn; yuewang@jlu.edu.cn

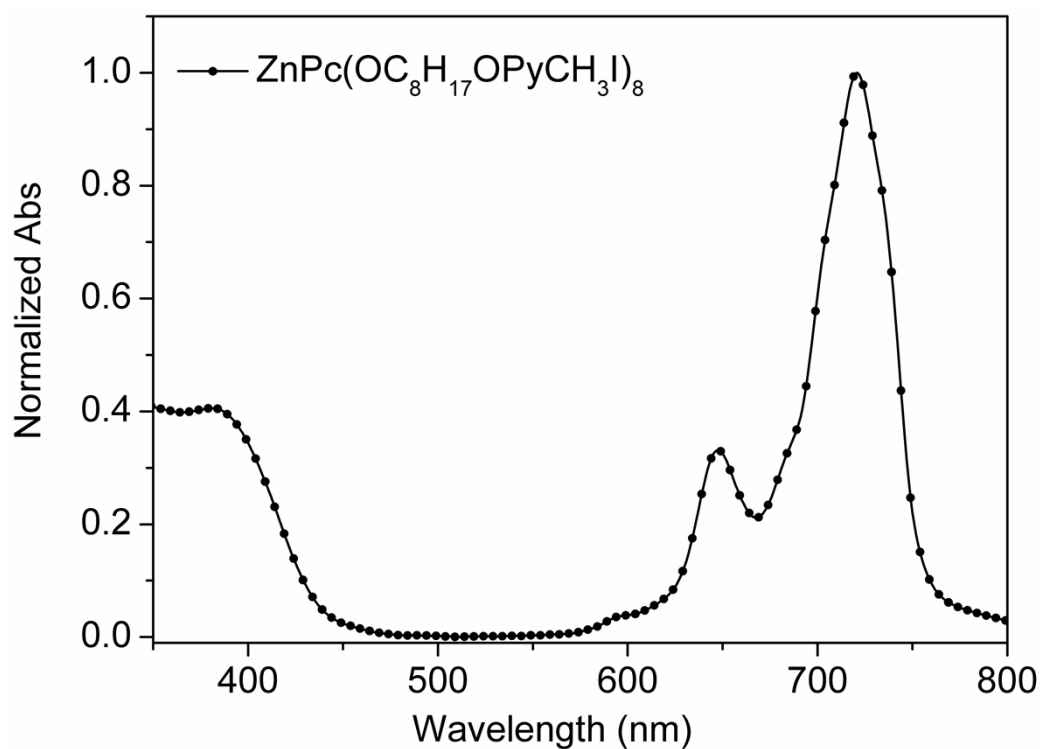

**Figure S1.** UV/Vis absorption spectrum of ZnPc(OC<sub>8</sub>H<sub>17</sub>OPyCH<sub>3</sub>I)<sub>8</sub> in DMF.

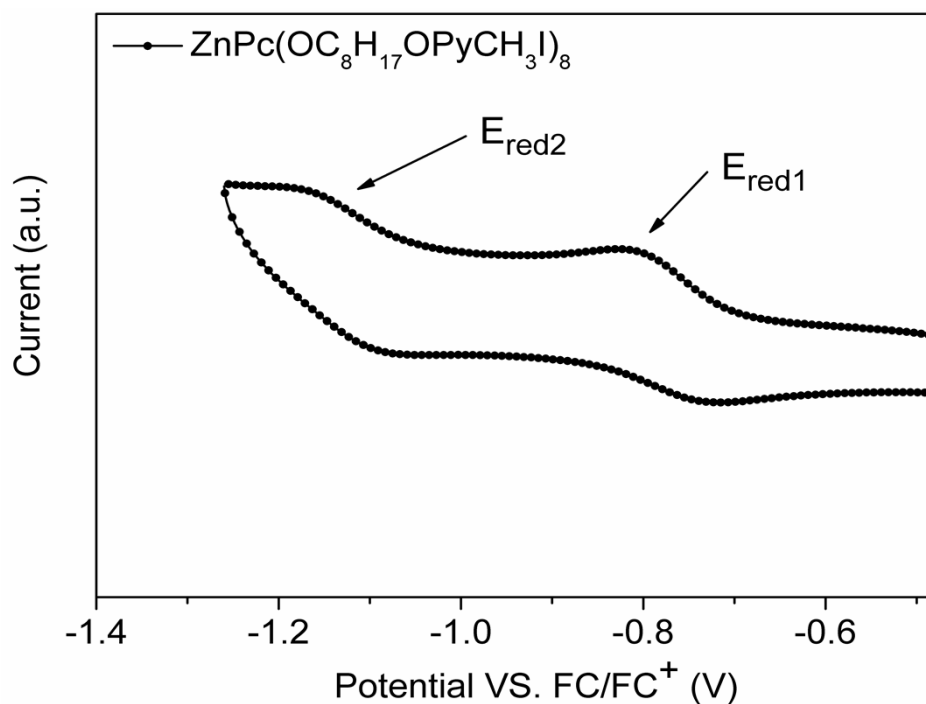

**Figure S2.** Cyclic voltammograms of  $\text{ZnPc}(\text{OC}_8\text{H}_{17}\text{OPyCH}_3\text{I})_8$  at room temperature, 0.1 M TBAPF6 in DMF (negative).

**Table S1.** Redox properties of  $\text{ZnPc}(\text{OC}_8\text{H}_{17}\text{OPyCH}_3\text{I})_8$  (vs.  $\text{FC}/\text{FC}^+$ ).

| $E_{\text{ox}}$<br>(eV) | $E_{\text{red1}}$<br>(V) | $E_{\text{red2}}$<br>(V) | HOMO <sup>[a]</sup><br>(eV) | LUMO <sup>[b]</sup><br>(eV) | $E_{\text{g}}^{\text{opt}[c]}$<br>(eV) |
|-------------------------|--------------------------|--------------------------|-----------------------------|-----------------------------|----------------------------------------|
| -                       | -0.75                    | -1.12                    | -5.37                       | -4.05                       | 1.32                                   |

[a] HOMO energy level was calculated using LUMO and  $E_{\text{g}}^{\text{opt}}$ .

[b] LUMO energy level was calculated using the reduction onset potential measured in DMF. The energy level of the ferrocene (Fc) reference (4.8 eV) was calibrated by measuring the cyclic voltammogram of Fc in corresponding solution.

[c] The optical band gap was calculated using the equation  $E_{\text{g}}^{\text{opt}} = 1240 \times \lambda_{\text{edge}}^{-1}$ , where  $\lambda_{\text{edge}}$  is the onset value of the absorption spectrum of the DMF solution in the direction of longer wavelength.

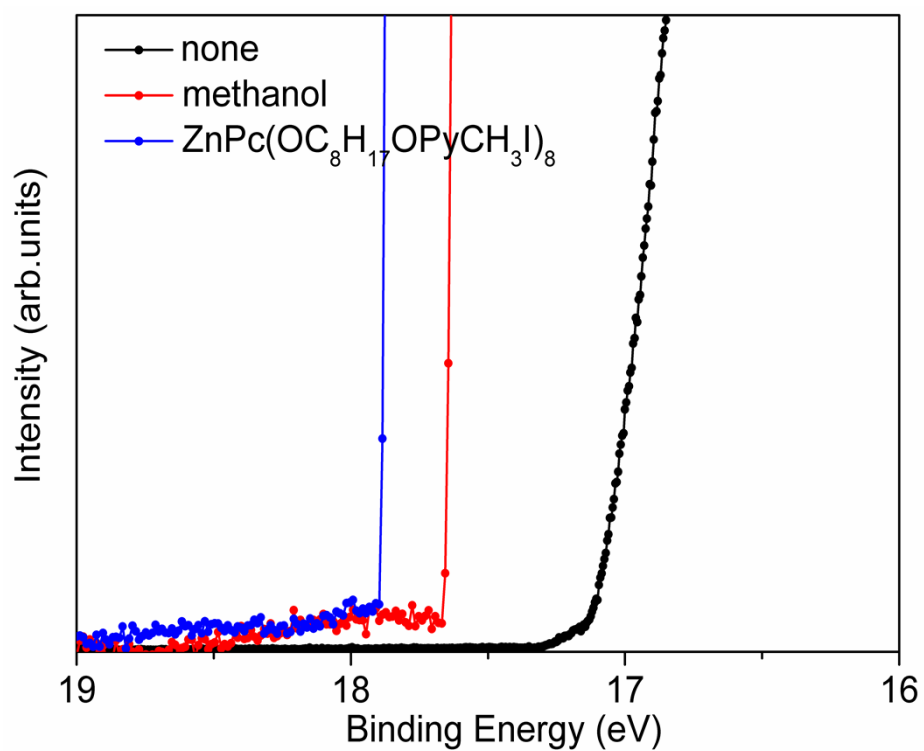

**Figure S3.** Ultraviolet photoelectron spectra of bare Al (black line), Al treated by methanol (red line) and Al covered by  $\sim 5$  nm ZnPc(OC<sub>8</sub>H<sub>17</sub>OPyCH<sub>3</sub>I)<sub>8</sub> within the range of 16 – 19 eV.

### Space charge limited current (SCLC) measurements of carrier-only devices

In order to obtain the electron and hole mobilities in the polymer solar cells, we carried out SCLC measurements of electron-only and hole-only devices. Charge carrier mobility can be measured in the SCLC regime as described by

$$J=9\varepsilon_0\varepsilon_r\mu V^2/8L^3, \quad (1)$$

Where  $\varepsilon_0$  is the permittivity of free space ( $8.8542\times 10^{-12}$  F/m),  $\varepsilon_r$  is the dielectric constant of the active layer,  $\mu_e$  is the electron mobility,  $V$  is the voltage drop across the device,  $L$  is the active layer thickness. The above equation holds if the mobility is field independent.  $\varepsilon_r$  is assumed to be 3.9 and  $L$  is 120nm in our analysis. Figure S4a and S4b present our  $J^{0.5}$ - $V$  analysis for the electron-only and hole-only devices, where  $V_r$  (the voltage drop due to contact resistance and series resistance across the electrodes) and  $V_{bi}$  (the built-in voltage due to the difference in work function of the two electrodes at both sides of active layer) are subtracted from experimental applied voltage. A straight line going through the origin of  $J^{0.5}$ - $V$  curves for the devices signifies that the mobility is field independent at field up to  $2\times 10^5$  V/cm. The field independent mobilities calculated from Eq. (1) are presented in Table S2.

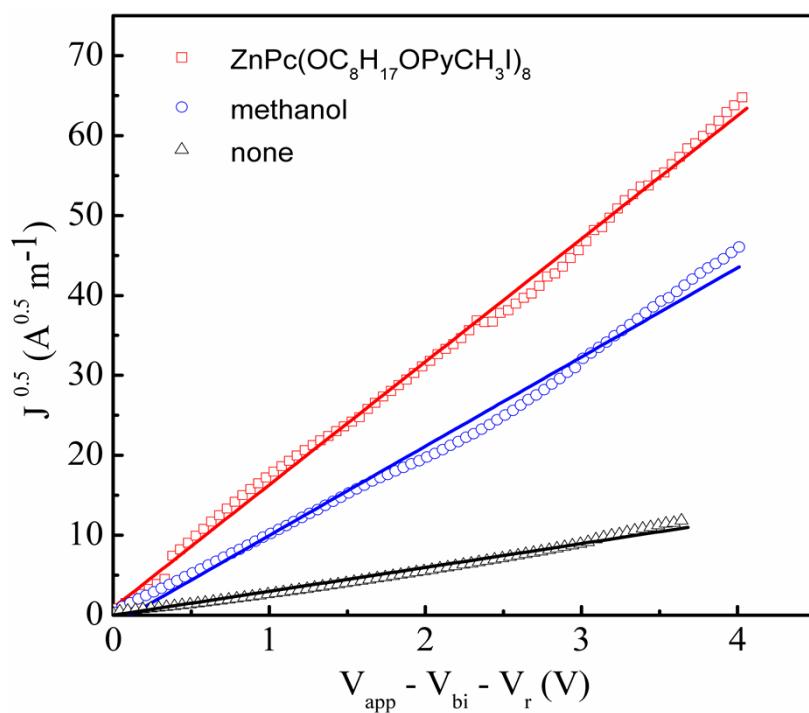

**Figure S4a.**  $J^{0.5}$  vs.  $V_{app} - V_{bi} - V_r$  plots for the electron-only devices.

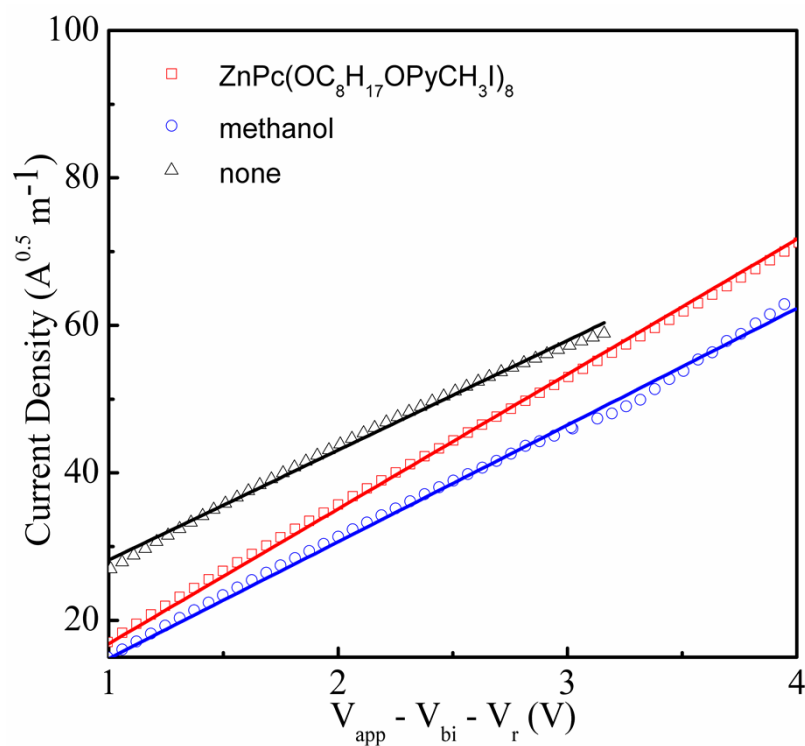

**Figure S4b.**  $J^{0.5}$  vs.  $V_{app} - V_{bi} - V_r$  plots for the hole-only devices.

**Table S2.** Electron and hole mobility of the devices with various interfacial treatments.

| Active Layer Treatment                                                  | Electron-only devices                                           | Hole-only devices                                           |
|-------------------------------------------------------------------------|-----------------------------------------------------------------|-------------------------------------------------------------|
|                                                                         | Electron mobility [ $\text{cm}^2 \text{V}^{-1} \text{S}^{-1}$ ] | Hole mobility [ $\text{cm}^2 \text{V}^{-1} \text{S}^{-1}$ ] |
| None                                                                    | $1.34 \times 10^{-5}$                                           | $3.25 \times 10^{-4}$                                       |
| Methanol                                                                | $1.82 \times 10^{-4}$                                           | $3.95 \times 10^{-4}$                                       |
| ZnPc(OC <sub>8</sub> H <sub>17</sub> OPyCH <sub>3</sub> I) <sub>8</sub> | $3.29 \times 10^{-4}$                                           | $4.12 \times 10^{-4}$                                       |

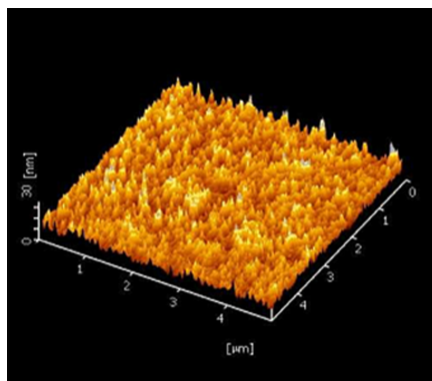

**Figure S5.** AFM image of PFN on PTB7:PC<sub>71</sub>BM film.

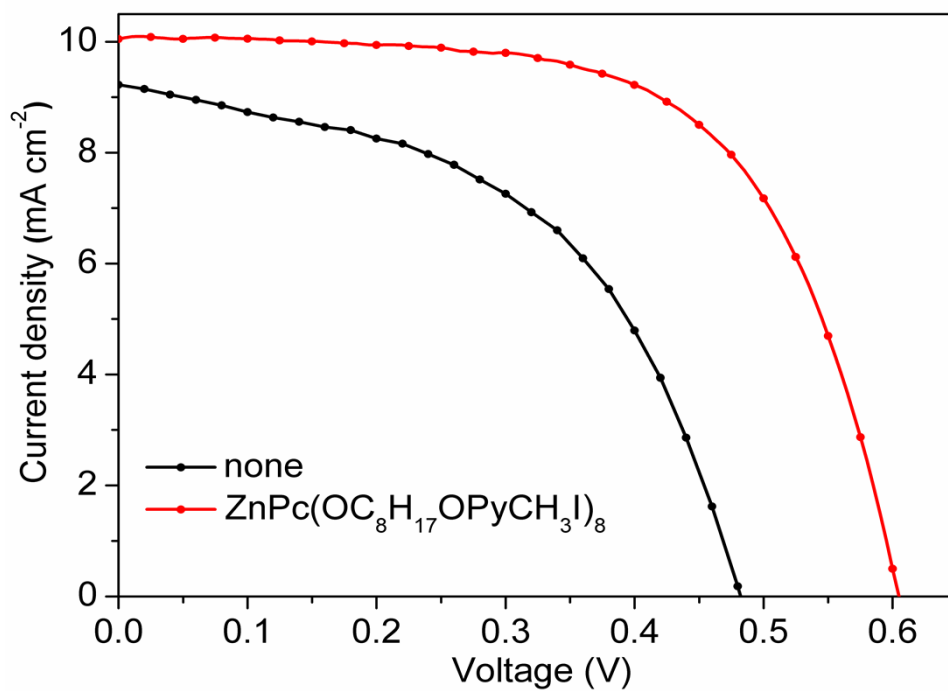

**Figure S6.** Current density versus voltage ( $J$ - $V$ ) characteristics of the PSCs based on P3HT:PC<sub>61</sub>BM with (red line) and without (black line) ZnPc(OC<sub>8</sub>H<sub>17</sub>OPyCH<sub>3</sub>I)<sub>8</sub> as

a

CIL.



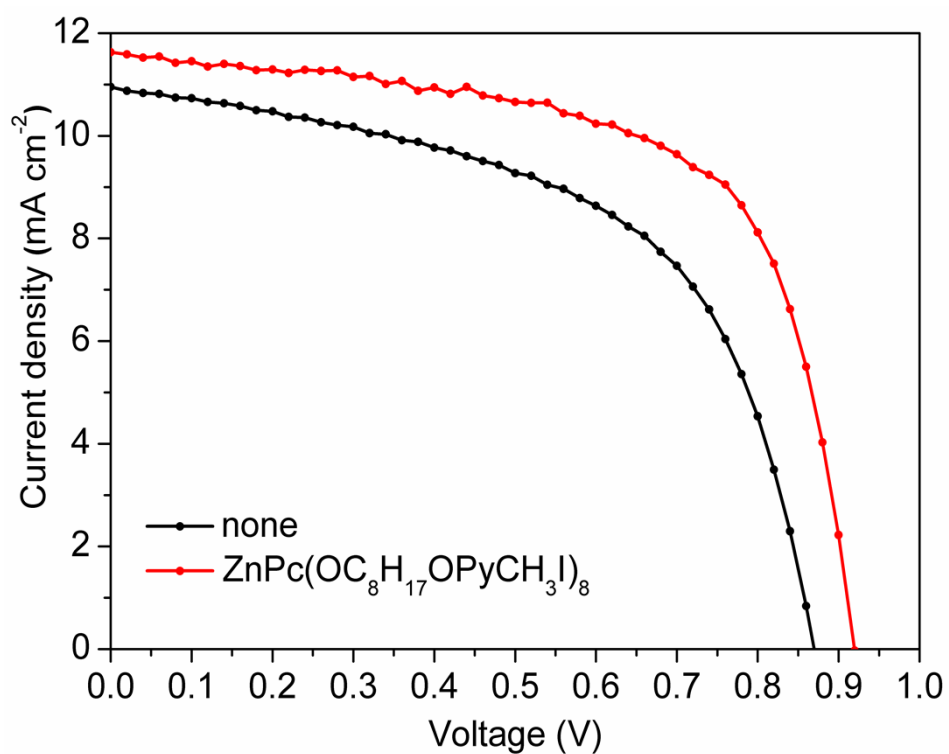

**Figure S7.** Current density versus voltage ( $J$ - $V$ ) characteristics of the PSCs based on PCDTBT:PC<sub>71</sub>BM with (red line) and without (black line) ZnPc(OC<sub>8</sub>H<sub>17</sub>OPyCH<sub>3</sub>I)<sub>8</sub> as a CIL.

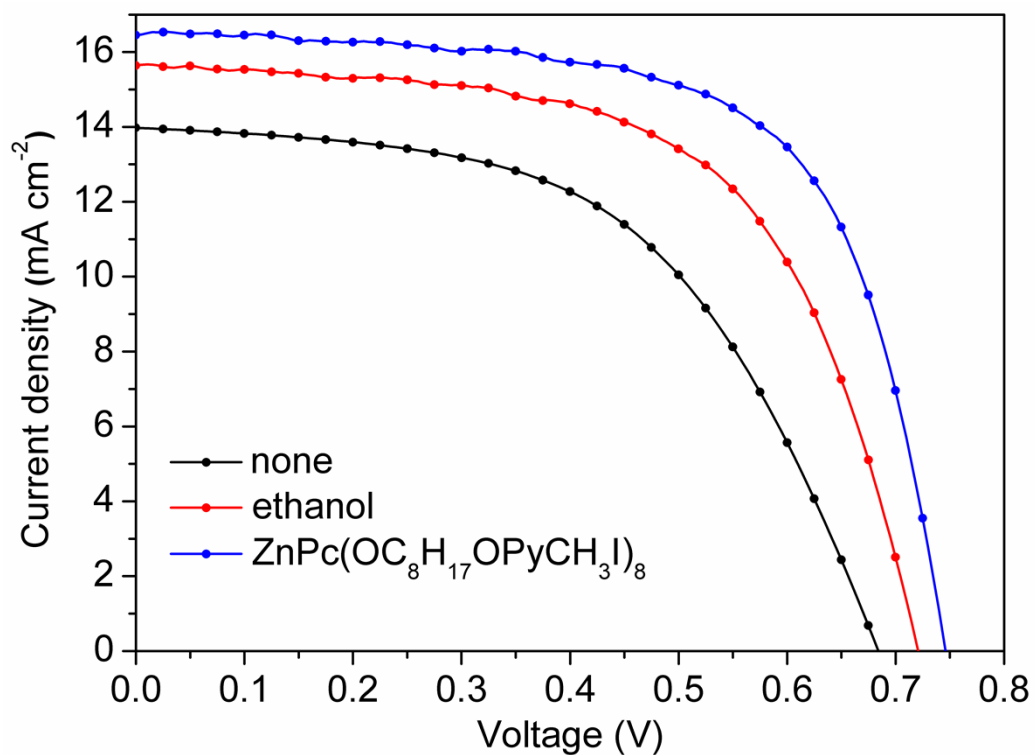

**Figure S8.** Current density versus voltage ( $J$ - $V$ ) characteristics of devices with  $\text{ZnPc}(\text{OC}_8\text{H}_{17}\text{OPyCH}_3\text{I})_8$  (blue line) as a CIL, with (red line) and without (black line) alcohol treatment at the surface of PTB7:PC<sub>71</sub>BM under 100 mW cm<sup>-2</sup> AM 1.5G illumination.
